# Supplementary material
Source: Research Square preprint supplement (doi:10.21203/rs.3.rs-9303324/v1)
Supplement: Supplementary file 1 [file cd64911d4fe8e244bd910074.docx]

**Supplemental information**


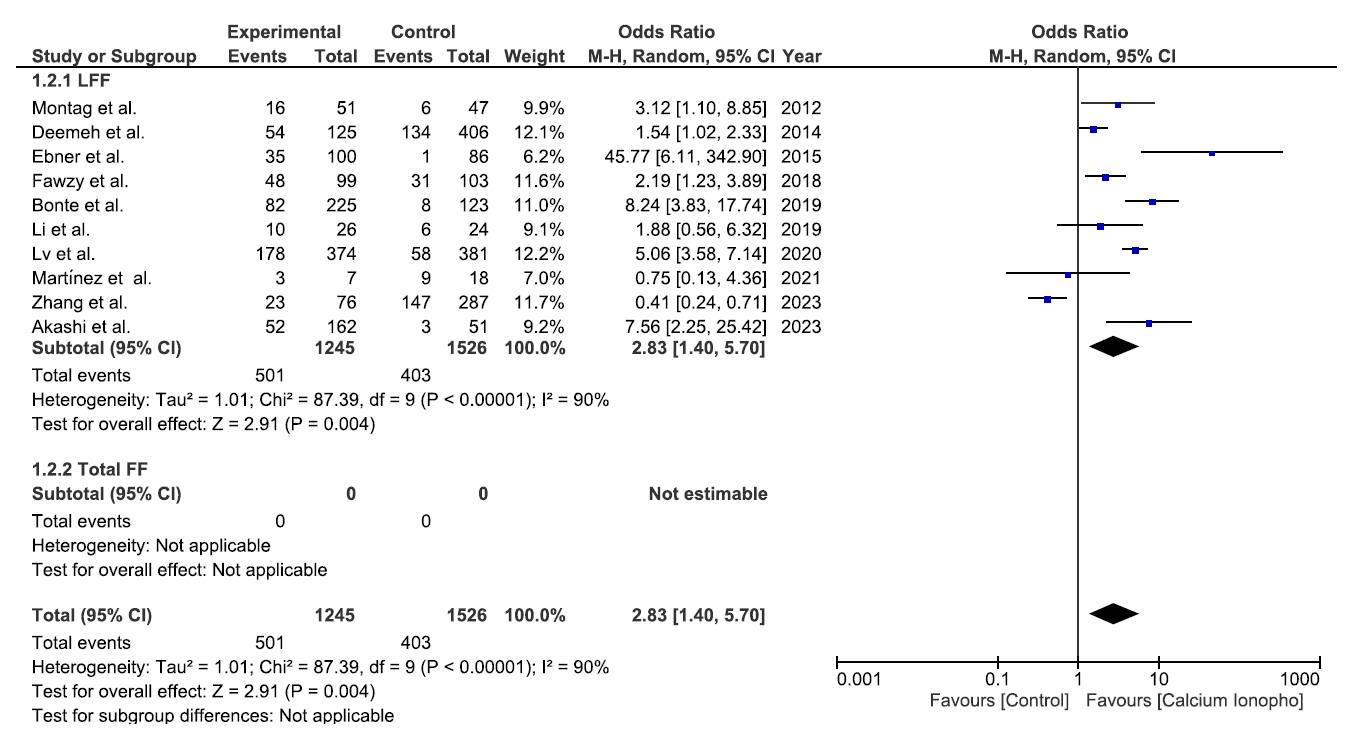


**Supplementary figure S1**. Forest plot for fertilization failure type subgroup analysis of clinical pregnancy rate.


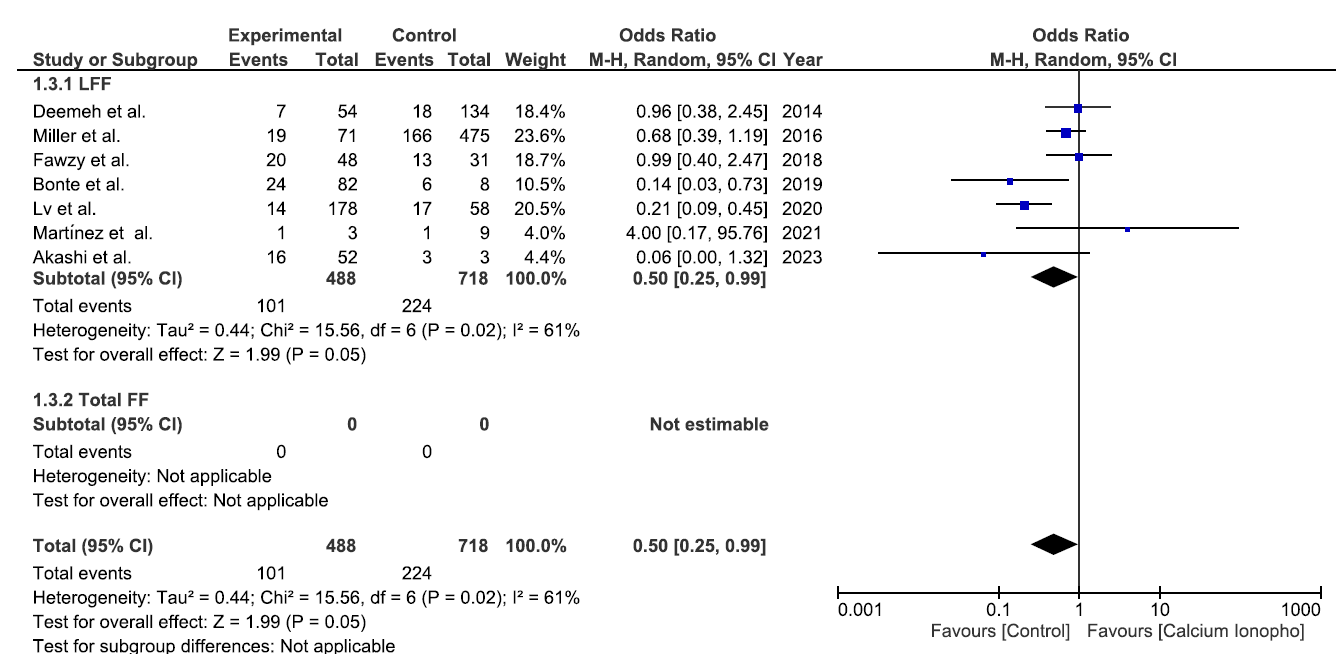


**Supplementary figure S2**. Forest plot for fertilization failure type subgroup analysis of miscarriage rate.


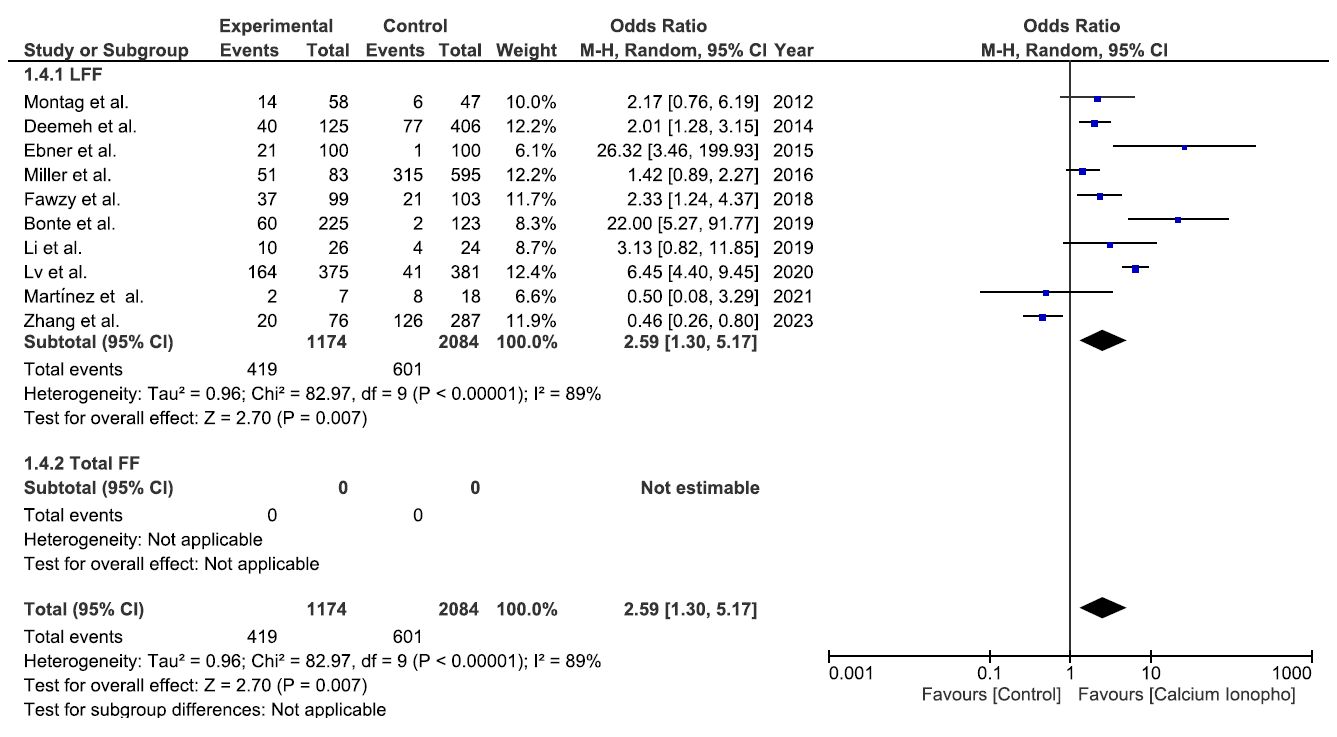


**Supplementary figure S3**. Forest plot for fertilization failure type subgroup analysis of live birth rate.


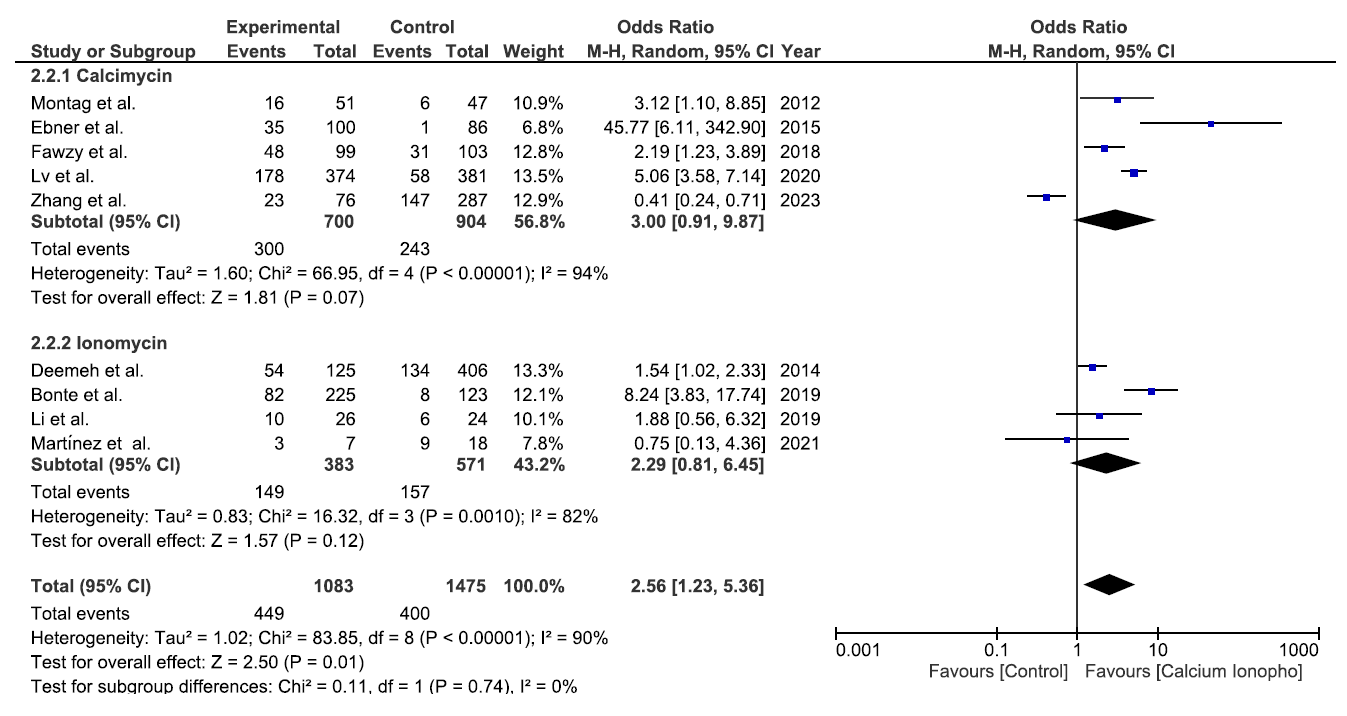


**Supplementary figure S4**. Forest plot for ionophore type subgroup analysis of clinical pregnancy rate.


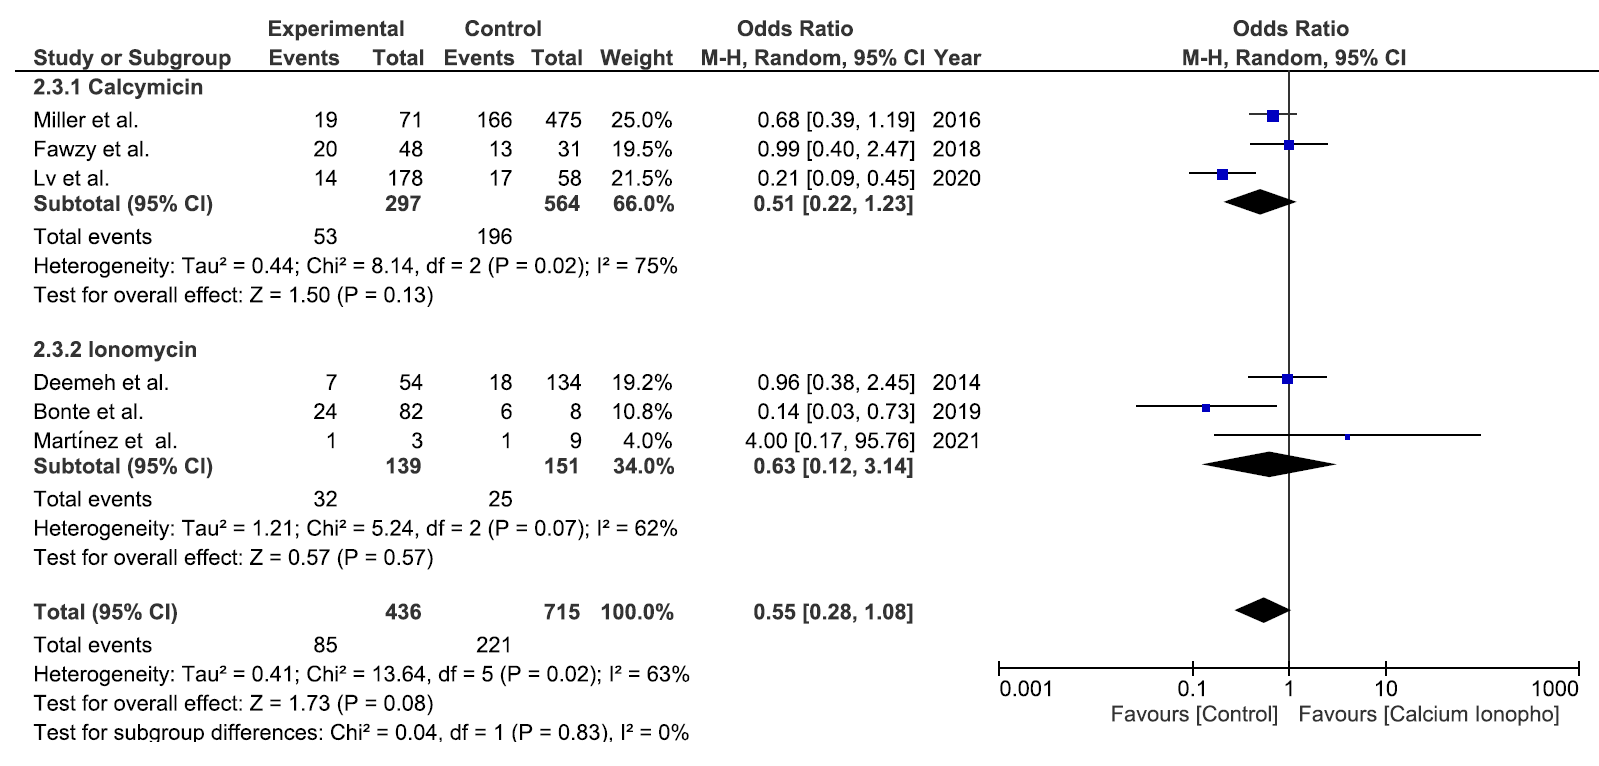


**Supplementary figure S5**. Forest plot for ionophore type subgroup analysis of miscarriage rate.


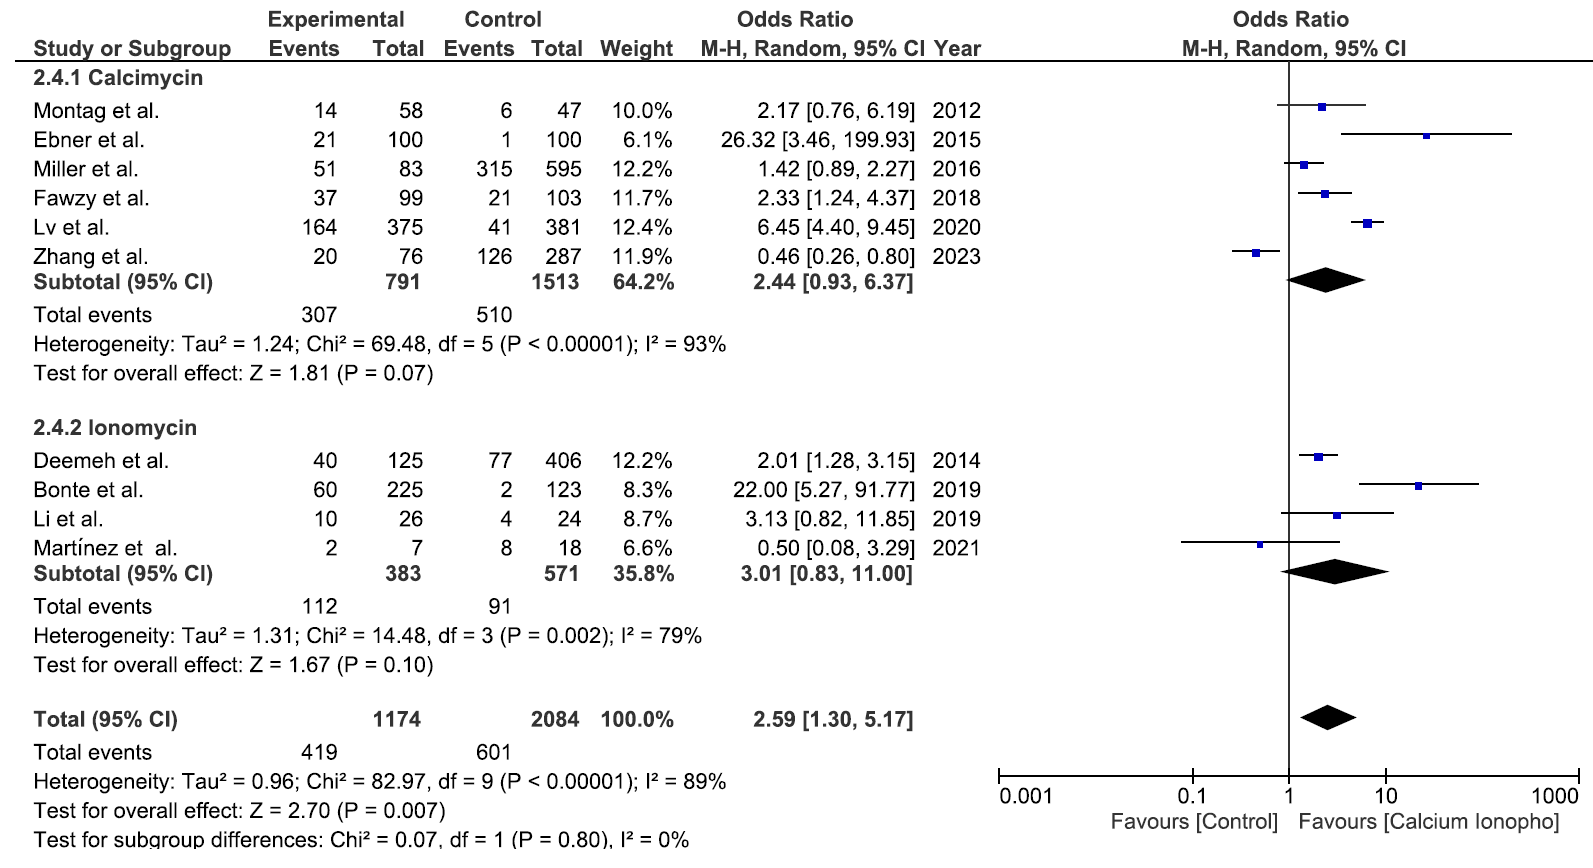


**Supplementary figure S6**. Forest plot for ionophore type subgroup analysis of live birth rate.


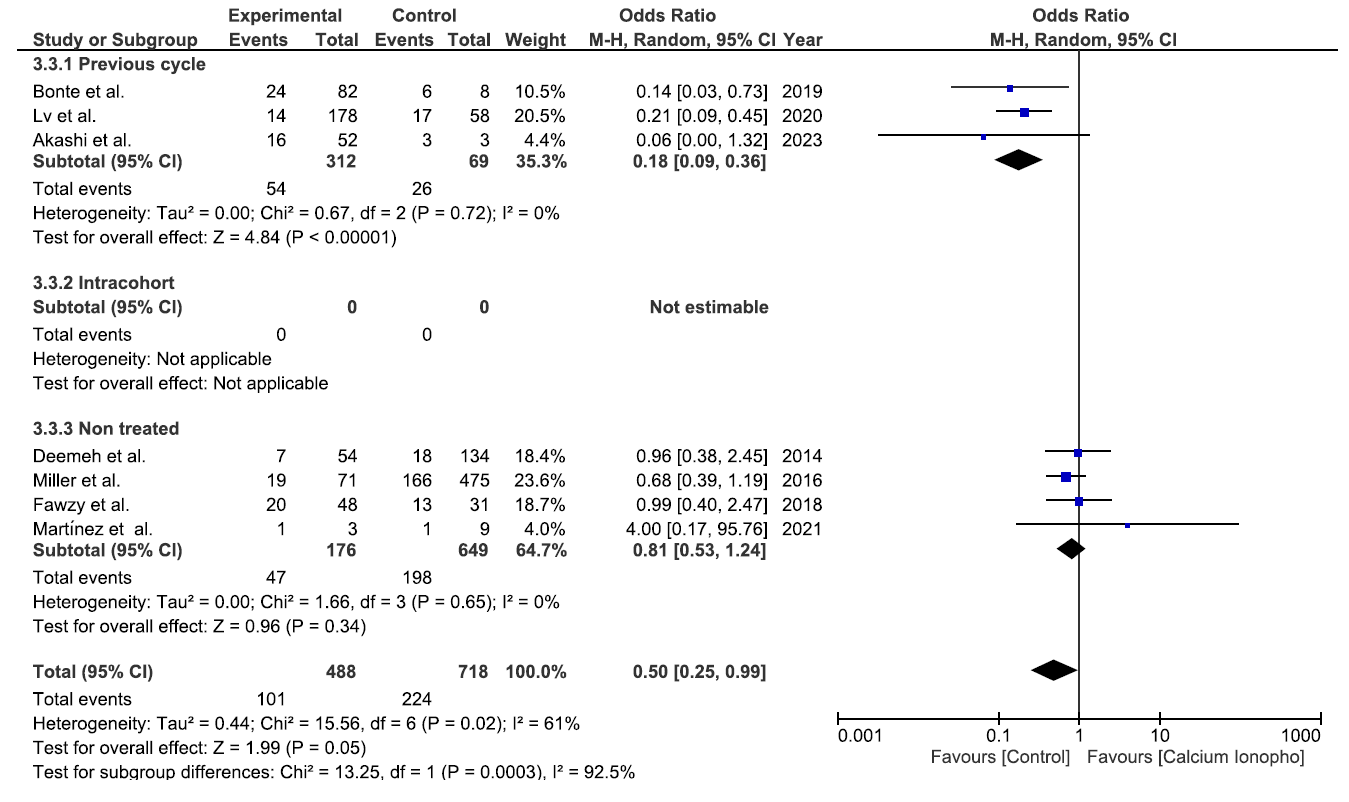


**Supplementary figure S7**. Forest plot for control type subgroup analysis of miscarriage rate.


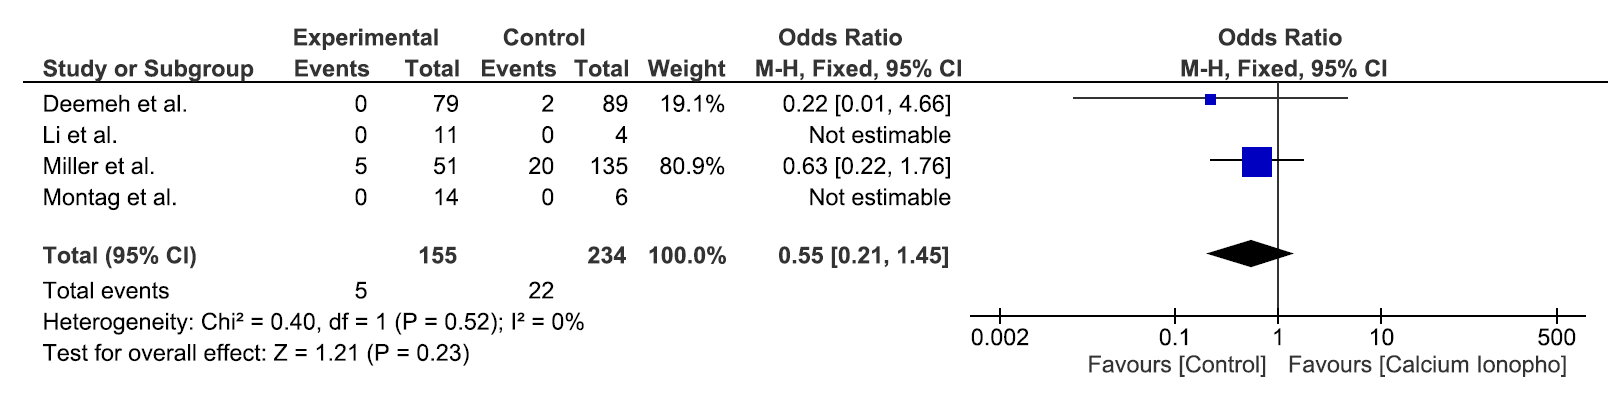


**Supplementary figure S8**. Forest plot for perinatal malformations.
